# Supplementary material for: Impacts of Sodium Arsenite on Wood Microbiota of Esca-Diseased Grapevines
Source: MDPI journal article supplement (doi:10.3390/jof7070498), 2021-06-22
Supplement: s1 [file s1]

Fig S1. Non-metric multidimensional scaling (NMDS) analysis of fungal communities based on the Bray-Curtis dissimilarity index. Data used for this analysis contain OTUs > 10 sequences. Each point represents data from a single sample. nMDS of fungal communities from treated and untreated vines (A) of all regions (B), in 2014 and 2015 (C) in different types of tissue (D).

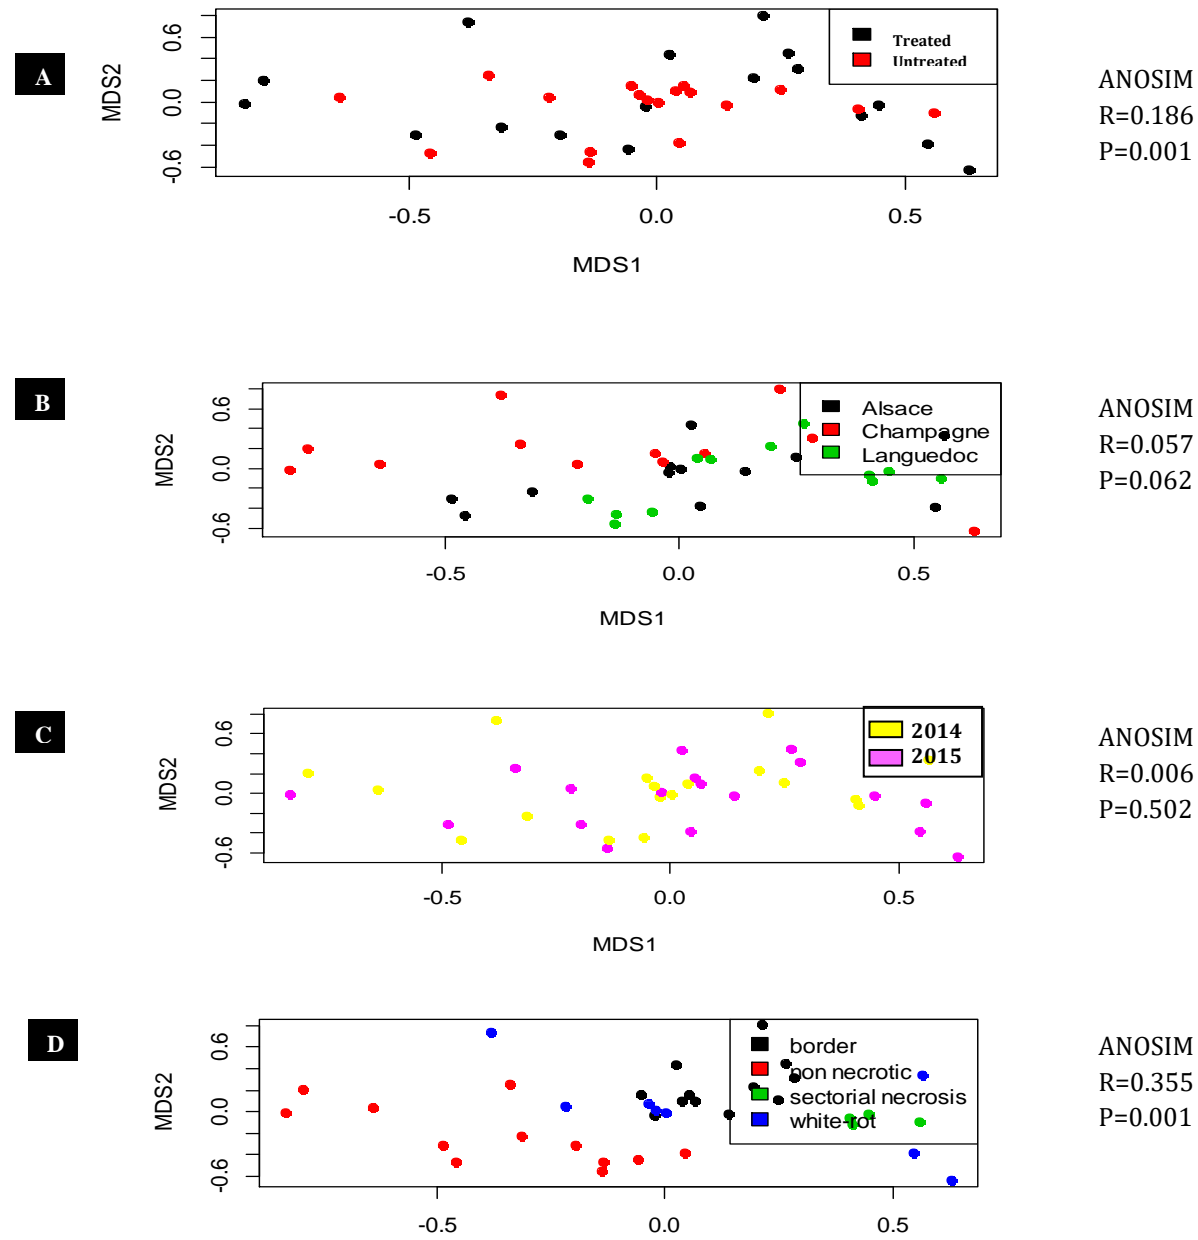

Figure S2. Non-metric multidimensional scaling (NMDS) analysis of fungal communities of untreated vines based on the Bray-Curtis dissimilarity index. Data used for this analysis contain all OTUs. Each point represents data from a single sample. Data used for this analysis contain all OTUs. nMDS of fungal communities from three regions (A) and from different types of tissues (B).

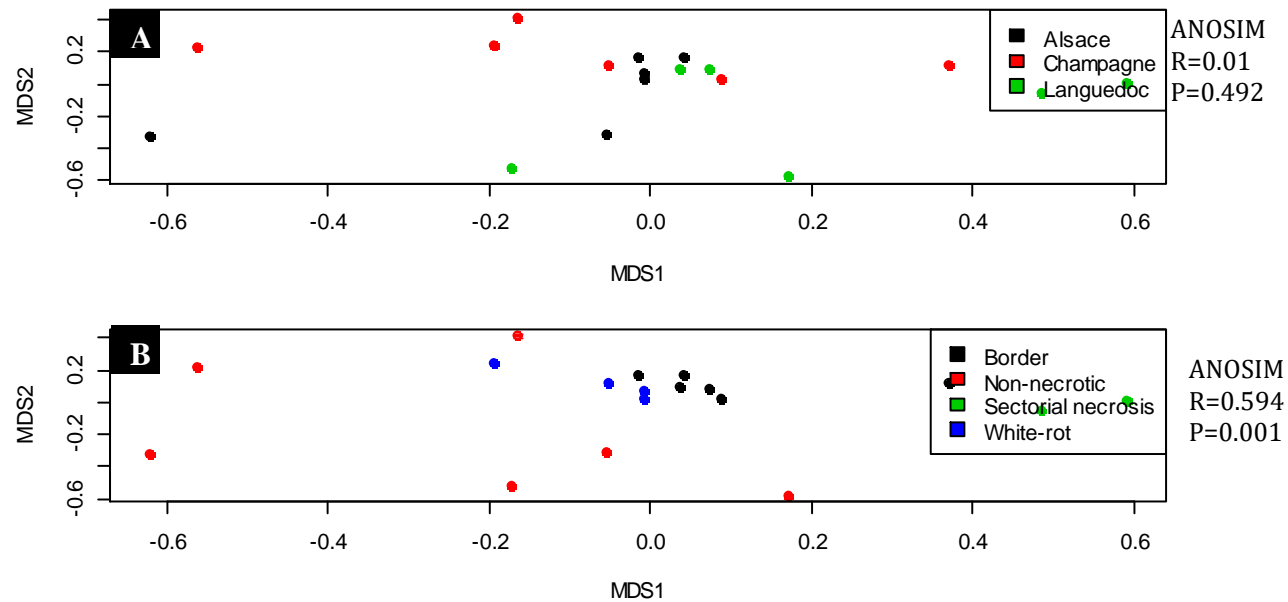

Figure S3. Non-metric multidimensional scaling (NMDS) analysis of bacterial communities of untreated vines based on the Bray-Curtis dissimilarity index. Data used for this analysis contain all OTUs. Each point represents data from a single sample. Data used for this analysis contain all OTUs. nMDS of fungal communities from three regions (A) and from different types of tissues (B).

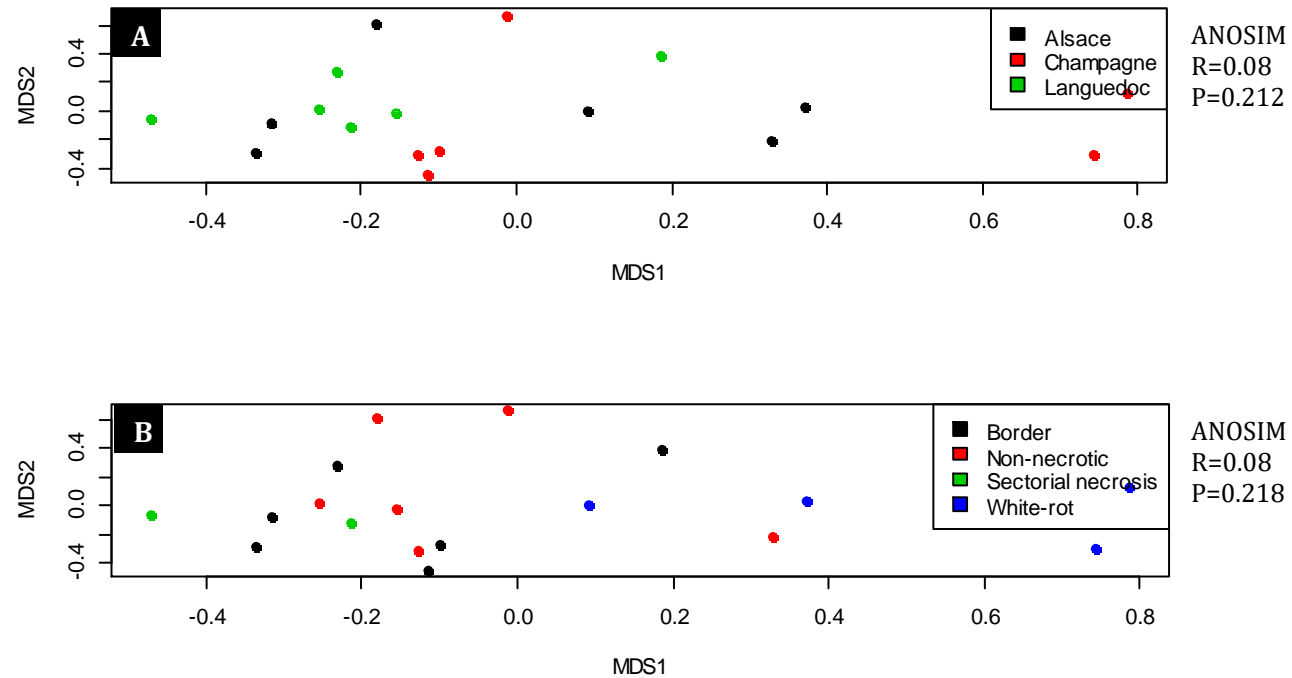

Table S1. Number of fungal and bacterial OTUs and reads per sample.

| Region    | Woody tissues      | Year | OTUs<br>number<br>Bacteria | Number of<br>reads |
|-----------|--------------------|------|----------------------------|--------------------|
| Alsace    | non necrotic       | 2014 | 905                        | 269102             |
| Alsace    | non necrotic       | 2015 | 1274                       | 26607              |
| Champagne | non necrotic       | 2014 | 1051                       | 169588             |
| Champagne | non necrotic       | 2015 | 1341                       | 56452              |
| Languedoc | non necrotic       | 2014 | 1531                       | 67069              |
| Languedoc | non necrotic       | 2015 | 1184                       | 101447             |
| Champagne | border             | 2014 | 787                        | 66647              |
| Champagne | border             | 2015 | 2090                       | 119157             |
| Alsace    | border             | 2014 | 634                        | 43405              |
| Alsace    | border             | 2015 | 1266                       | 109393             |
| Languedoc | border             | 2014 | -                          | -                  |
| Languedoc | border             | 2015 | 1100                       | 53123              |
| Alsace    | white-rot          | 2014 | 258                        | 45720              |
| Alsace    | white-rot          | 2015 | 653                        | 150876             |
| Champagne | white-rot          | 2014 | 405                        | 79056              |
| Champagne | white-rot          | 2015 | 591                        | 120819             |
| Languedoc | sectorial necrosis | 2014 | 1273                       | 176102             |
| Languedoc | sectorial necrosis | 2015 | 1513                       | 134858             |

“-“ : PCR did not work

| Region    | Woody tissues      | Year | OTUs number<br>Fungi | Number of<br>reads |
|-----------|--------------------|------|----------------------|--------------------|
| Alsace    | non necrotic       | 2014 | 439                  | 306871             |
| Alsace    | non necrotic       | 2015 | 389                  | 77800              |
| Champagne | non necrotic       | 2014 | 316                  | 44178              |
| Champagne | non necrotic       | 2015 | 370                  | 88752              |
| Languedoc | non necrotic       | 2014 | 387                  | 53890              |
| Languedoc | non necrotic       | 2015 | 348                  | 53129              |
| Champagne | border             | 2014 | 295                  | 91815              |
| Champagne | border             | 2015 | 249                  | 53893              |
| Alsace    | border             | 2014 | 242                  | 94211              |
| Alsace    | border             | 2015 | 319                  | 89336              |
| Languedoc | border             | 2014 | 300                  | 96616              |
| Languedoc | border             | 2015 | 335                  | 103790             |
| Alsace    | white-rot          | 2014 | 230                  | 35990              |
| Alsace    | white-rot          | 2015 | 256                  | 72382              |
| Champagne | white-rot          | 2014 | 178                  | 16144              |
| Champagne | white-rot          | 2015 | 239                  | 57372              |
| Languedoc | sectorial necrosis | 2014 | 273                  | 71638              |
| Languedoc | sectorial necrosis | 2015 | 263                  | 48993              |

Table S2. Fungal strains isolated from grapevine woody tissues in 2015

|                                    | Region    | Tissue             | Arsenite  |
|------------------------------------|-----------|--------------------|-----------|
| <i>Phaeomoniella chlamydospora</i> | Alsace    | Black punctuation  | treated   |
| <i>Fomitiporia mediterranea</i>    | Champagne | Border             | untreated |
| <i>Eutypa lata</i>                 | Alsace    | Sectorial necrosis | treated   |
| <i>Trichoderma</i> sp.             | Champagne | Black punctuation  | treated   |
| <i>Penicillium</i> sp. Strain 1    | Champagne | Border             | treated   |
| <i>Penicillium</i> sp. Strain 2    | Languedoc | Non-necrotic       | treated   |

Table S3. Simpson and Shannon indexes of non-necrotic, border and white-rot tissues of Alsace, Champagne and Languedoc in 2014 and 2015.

| Simpson (2014) | Alsace          | Non-necrotic | Border | White rot |
|----------------|-----------------|--------------|--------|-----------|
| Treated        | <b>Fungi</b>    | 0.42         | 0.11   | 0.62      |
|                | <b>Bacteria</b> | 0.86         | 0.87   | 0.64      |
| Untreated      | <b>Fungi</b>    | 0.89         | 0.55   | 0.19      |
|                | <b>Bacteria</b> | 0.70         | 0.98   | 0.95      |

| Simpson (2014) | Champagne       | Non-necrotic | Border | White rot |
|----------------|-----------------|--------------|--------|-----------|
| Treated        | <b>Fungi</b>    | 0.79         | 0.68   | 0.43      |
|                | <b>Bacteria</b> | 0.45         | 0.99   | 0.62      |
| Untreated      | <b>Fungi</b>    | 0.53         | 0.37   | 0.32      |
|                | <b>Bacteria</b> | 0.09         | 0.98   | 0.84      |

| Simpson (2014) | Languedoc       | Non-necrotic | Border | Sectorial necrosis |
|----------------|-----------------|--------------|--------|--------------------|
| Treated        | <b>Fungi</b>    | 0.91         | 0.76   | 0.76               |
|                | <b>Bacteria</b> | 0.98         | -      | 0.87               |
| Untreated      | <b>Fungi</b>    | 0.91         | 0.45   | 0.67               |
|                | <b>Bacteria</b> | 0.92         | 0.80   | 0.97               |

| Simpson (2015) | Alsace          | Non-necrotic | Border | White rot |
|----------------|-----------------|--------------|--------|-----------|
| Treated        | <b>Fungi</b>    | 0.85         | 0.65   | 0.78      |
|                | <b>Bacteria</b> | 0.99         | 0.84   | 0.59      |
| Untreated      | <b>Fungi</b>    | 0.69         | 0.60   | 0.24      |
|                | <b>Bacteria</b> | 0.79         | 0.96   | 0.79      |

| Simpson (2015) | Champagne       | Non-necrotic | Border | White rot |
|----------------|-----------------|--------------|--------|-----------|
| Treated        | <b>Fungi</b>    | 0.81         | 0.77   | 0.56      |
|                | <b>Bacteria</b> | 0.98         | 0.98   | 0.76      |
| Untreated      | <b>Fungi</b>    | 0.74         | 0.36   | 0.13      |
|                | <b>Bacteria</b> | 0.99         | 0.99   | 0.77      |

| Simpson (2015) | Languedoc       | Non-necrotic | Border | Sectorial necrosis |
|----------------|-----------------|--------------|--------|--------------------|
| Treated        | <b>Fungi</b>    | 0.84         | 0.64   | 0.79               |
|                | <b>Bacteria</b> | 0.35         | 0.94   | 0.96               |
| Untreated      | <b>Fungi</b>    | 0.89         | 0.41   | 0.85               |
|                | <b>Bacteria</b> | 0.98         | 0.69   | 0.99               |

| Shannon (2014) | Alsace   | Non-necrotic | Border | White rot |
|----------------|----------|--------------|--------|-----------|
| Treated        | Fungi    | 1.04         | 0.43   | 1.53      |
|                | Bacteria | 2.51         | 3.4    | 1.39      |
| Untreated      | Fungi    | 2.89         | 1.24   | 0.57      |
|                | Bacteria | 1.73         | 4.98   | 4.40      |

| Shannon (2014) | Champagne | Non-necrotic | Border | White rot |
|----------------|-----------|--------------|--------|-----------|
| Treated        | Fungi     | 2.64         | 1.43   | 1.17      |
|                | Bacteria  | 1.59         | 4.87   | 1.34      |
| Untreated      | Fungi     | 1.26         | 0.90   | 0.99      |
|                | Bacteria  | 0.37         | 5.24   | 2.37      |

| Shannon (2014) | Languedoc | Non-necrotic | Border | Sectorial necrosis |
|----------------|-----------|--------------|--------|--------------------|
| Treated        | Fungi     | 3.06         | 1.70   | 1.80               |
|                | Bacteria  | 5.40         | -      | 3.27               |
| Untreated      | Fungi     | 3.19         | 1.01   | 1.60               |
|                | Bacteria  | 4.28         | 2.63   | 4.77               |

| Shannon (2015) | Alsace   | Non-necrotic | Border | White rot |
|----------------|----------|--------------|--------|-----------|
| Treated        | Fungi    | 2.60         | 1.52   | 1.79      |
|                | Bacteria | 5.94         | 3.39   | 1.59      |
| Untreated      | Fungi    | 2.14         | 1.57   | 0.66      |
|                | Bacteria | 2.13         | 4.45   | 2.33      |

| Shannon (2015) | Champagne | Non-necrotic | Border | White rot |
|----------------|-----------|--------------|--------|-----------|
| Treated        | Fungi     | 2.16         | 1.83   | 1.51      |
|                | Bacteria  | 5.50         | 5.51   | 1.97      |
| Untreated      | Fungi     | 2.38         | 0.92   | 0.44      |
|                | Bacteria  | 6.25         | 5.86   | 2.15      |

| Shannon (2015) | Languedoc | Non-necrotic | Border | Sectorial necrosis |
|----------------|-----------|--------------|--------|--------------------|
| Treated        | Fungi     | 2.73         | 1.36   | 2.03               |
|                | Bacteria  | 1.60         | 4.52   | 4.48               |
| Untreated      | Fungi     | 3.17         | 0.94   | 2.21               |
|                | Bacteria  | 5.36         | 1.93   | 5.51               |



Table S4. Statistical results of the Kruskal-Wallis tests for the 20 most abundant fungal species. In yellow, the statistics showed significant differences.

| Kruskal_Wallis test (non parametrique) | <i>Alternaria spp.</i>                           | <i>Aspergillus spp.</i> | <i>Aureobasidium pullulans</i>                   | <i>Unknown Agaricales genus</i> | <i>Cladosporium spp.</i> | <i>Diplodia seriata</i>                      | <i>Eutypa lata</i> | <i>Fomitiporia mediterranea</i> | <i>Hypocrea lixii</i> | <i>Ionotus hispidus</i> | <i>Lepiota brunneoincarnata</i> | <i>Mucor circinelloides.</i> | <i>Mycena maurella</i> | <i>Penicillium spp.</i> | <i>Phaeoacremonium viticola</i>         | <i>Phaeoacremonium chlamydosporum</i> | <i>Phaeoacremonium fraxinopennysylvanicum</i> | <i>Sebacina vermifera</i> | <i>Seimatosporium vitis</i> | <i>Trichoderma atroviride</i> |
|----------------------------------------|--------------------------------------------------|-------------------------|--------------------------------------------------|---------------------------------|--------------------------|----------------------------------------------|--------------------|---------------------------------|-----------------------|-------------------------|---------------------------------|------------------------------|------------------------|-------------------------|-----------------------------------------|---------------------------------------|-----------------------------------------------|---------------------------|-----------------------------|-------------------------------|
| Tissues                                | 0.03 (Non-necrotic tissue differ from the other) | 0,472                   | 0.05 (Non-necrotic tissue differ from the other) | 0,3491                          | 0,043                    | 0.018 (sectorial necrosis differ from other) | 0,594              | 0,9182                          | 0,238                 | 0,453                   | 0,453                           | 0,75                         | 0,88                   | 0,632                   | 0,147                                   | 0.006 (border from the other tissue)  | 0,499                                         | 0,616                     | 0,1122                      | 0,702                         |
| Region                                 | 0,205                                            | 0,125                   | 0,737                                            | 0,07                            | 0,519                    | 0,09                                         | 0,082              | 0,894                           | 0,28                  | 0,441                   | 0,86                            | 0,663                        | 0,894                  | 0,352                   | 0.004 (Languedoc from the other region) | 0,325                                 | 0,472                                         | 0,6                       | 0.035                       | 0,47                          |
| Treated/Untreated                      | 0,75                                             | 0,07                    | 0,964                                            | 0,757                           | 0,825                    | 0,269                                        | 0,08               | <0.001                          | 0,401                 | 0,026                   | 0,03                            | 0,543                        | 0,02                   | 0,475                   | 0,691                                   | 0,894                                 | 0,724                                         | 0,5658                    | 0,02                        | 0,233                         |

Table S5. Statistical results of the Kruskal-Wallis tests for the 20 most abundant bacterial genera. In yellow, the statistics showed significant differences.

| Kruskal-Wallis test   | <i>Ammibacterium</i> sp. | <i>Badyrhibacterium</i> sp. | <i>Brevundimonas</i> sp. | <i>Buttiauxella</i> sp. | <i>Cellulomonas</i> sp. | <i>Chryseobacterium</i> sp. | <i>Cloacibacterium</i> sp. | <i>Curto-bacterium</i> sp. | <i>Enterobacter</i> sp. | <i>Erwinia</i> sp. | <i>Methylobacterium</i> sp. | <i>Microbacterium</i> sp. | <i>Nocardia</i> sp. | <i>Pantoea</i> sp. | <i>Pseudomonas</i> sp. | <i>Raoultella</i> sp. | <i>Rhizobium</i> sp. | <i>Sodalis</i> sp. | <i>Sphingomonas</i> sp. | <i>Yersinia</i> sp. |
|-----------------------|--------------------------|-----------------------------|--------------------------|-------------------------|-------------------------|-----------------------------|----------------------------|----------------------------|-------------------------|--------------------|-----------------------------|---------------------------|---------------------|--------------------|------------------------|-----------------------|----------------------|--------------------|-------------------------|---------------------|
| Tissues               | 0.14                     | 0.045                       | 0.057                    | 0.57                    | 0.075                   | 0.93                        | 0.811                      | 0.035                      | 0.216                   | 0.01               | 0.75                        | 0.452                     | 0.53                | 0.018              | 0.021                  | 0.119                 | 0.169                | 0.093              | 0.042                   | 0.038               |
| Region                | 0.125                    | 0.1022                      | 0.2351                   | 0.486                   | 0.573                   | 0.9623                      | 0.7545                     | 0.064                      | 0.732                   | 0.3976             | 0.562                       | 0.3874                    | 0.149               | 0.103              | 0.703                  | 0.593                 | 0.83                 | 0.5521             | 0.302                   | 0.24                |
| Treated/<br>Untreated | 0.163                    | 0.501                       | 0.63                     | 0.634                   | 0.148                   | 0.809                       | 0.923                      | 0.336                      | 0.531                   | 0.847              | 0.652                       | 0.847                     | 0.441               | 0.847              | 0.923                  | 0.289                 | 0.93                 | 0.136              | 0.847                   | 0.386               |

Table S6. ITS1 sequences of the 20 most abundant fungal OTUs identified in grapevine trunk.

In blue 18S, in purple 5.8S

#OTU-1 *Alternaria* spp. from to the *A. alternata* clade

AAGTCGTAACAAGGTCTCCGTAGGTGAACCTGCGGAGGGATCATTACACAAATATGAAGGCGGGCTGGAACCTCTCGGGGTACAGCCTTGC  
TGAATTATTCACCCTTGTCTTTTTCGCTACTTCTTGTTCCTTGGTGGGTTCGCCCACCACTAGGACAAACATAAACCTTTTGTAATTGCAATCAG  
CGTCAGTAACAAATTAATAATTACAACCTTTCAACAACGGATCTCTTGGTTCTGGCATCGATGAAGAACGCAGC

#OTU-2 *Aspergillus* spp. from to the *A. penicillioide*s clade

AAGTCGTAACAAGGTTTCCGTAGGTGAACCTGCGGAAGGATCATTACCGAGTGTTTGGGCGCCCCTTCTCGGGGTGTCCGTCCTCCCATCCGT  
GTCTCTTTGTACCTGTTGCTTCGGCGGGGCCCGCCCTCCGTGGCCGCCGGGGGGCCTCCCTGGCCcccGGGCCCCTGCCCGCCGGAGACCTCAA  
CCATGAACACTGTCTGAAGGTTGCAGTCTGAGTACCGATAGTAAAAATCGTTAAACCTTTCAACAACGGATCTCTTGGTTCCGGCATCGATGA  
AGAACGCAGC

#OTU-3 *Aurebasidium pullulans*

AAGTCGTAACAAGGTTTCCGTAGGTGAACCTGCGGAAGGATCATTAAAGAGTAAGGGTGCTCAGCGCCCGACCTCCAACCTTTGTTGTTAAA  
ACTACCTTGTTGCTTTGGCGGGACCGCTCGGTCTCGAGCCGCTGGGGATTTCGTCCCAGGCGAGCGCCCGCCAGAGTTAAACCAAACCTCTTGTT  
ATTTAACCGGTCGTCTGAGTTAAATTTTGAATAAATCAAAACCTTTCAACAACGGATCTCTTGGTTCTCGCATCGATGAAGAACGCAGC

#OTU-4 Unknown *Agaricales* genus

AAGTCGTAACAAGGTTTCCGTAGGTGAACCTGCGGAAGGATCATTATTGAATGTATTTGCAAGTTGGTTGTAGCTGGCTTCTCGGAGTATTGT  
GCTCGCCACTTGCTCTACTACTTTTCCACCTGTGAACCTTTGTAGATCACGAATGAACTCTCGCCTGAAAATGGCGGTTTGAGGGACTTGTCC  
CTTGATAGTTTCGTGGTCTATGTTTATATCTACCCTATGTTTGTCTTTGAATGTCTTTTAAATGGTCTTTGACCTTTAAATACTATACAACCTTTTAG  
CAACGGATCTCTTGGCTCTCGCATC

#OTU-5 *Cladosporium* spp.

AAGTCGTAACAAGGTCTCCGTAGGTGAACCTGCGGAGGGATCATTACAAGTGACCCCGGTCTAACCACCGGGATGTTTATAACCTTTGTTGT  
CCGACTCTGTTGCCTCCGGGGCGACCCTGCCTTCGGGCGGGGGCTCCGGGTGGACACTTCAAACCTCTTGCCTAACCTTTGCAGTCTGAGTAAAC  
TTAATTAATAAATTAACCTTTTAACAACGGATCTCTTGGTTCTGGCATCGATGAAGAACGCAGC

#OTU-6 *Diplodia seriata*

AAGTCGTAACAAGGTTTCCGTAGGTGAACCTGCGGAAGGATCATTACCGAGTTCTCGGGCTTCGGCTCGAATCTCCCACCCTTTGTGAACATA  
CCTCTGTTGCTTTGGCGGCTCTTTGCCGCGAGGAGGCCCTCGCGGGCCCCCGCGCGCTTTCTGCCAGAGGACCTTCAAACCTCCAGTCAGTAA  
ACGTCGACGTCTGATAAACAAGTTAATAAACTAAAACTTTCAACAACGGATCTCTTGGTTCTGGCATCGATGAAGAACGCAGC

#OTU-7 *Eutypa lata*

AAGTCGTAACAAGGTTCTCCGTTGGTGAACCAGCGGAGGGATCATTACAGAGTTACCTAACTCCAAACCCATGTGAACTTACCTATGTTGCCTC  
GGCGGGGAAGCCTACCCGGTACCTACCCTGTAGCTACCCGGGAGCGAGCTACCCTGTAGCCCGCTGCAGGCCTACCCGCCGGTGGACACTTA  
AACTCTTGTTTTTTTAGTGATTATCTGAGTGTTTATACTTAATAAGTTAAAACTTTCAACAACGGATCTCTTGGTTCTGGCATCGATGAAGAAC  
GCAGC

#OTU-8 *Fomitiporia mediterranea*

AAGTCGTAACAAGGTTTCCGTAGGTGAACCTGCGGAAGGATCATTACGAGTTGGAACGTGGAGGTTGATGCTGGTGCA<sup>Tatata</sup>GTGTACATGT  
GCTCGCCTTCACACTCTTCATCCACTCAACCCCTGTGCACTTTATCAGAGTTAGTAATAGTATTGTGGTGGCAGCCGTTTGTTATTTCATTGTTAG  
AAGCGGGGTAACCTCTTTCTAGCAGTAGTAATAATAACAATCTTGGTTCTACTACTATTACTGTGAACACTTTGACTTTTACTTATACAAACACT  
TTGCTTGTTCTTGTGAATGTGAATGCTCCTTGTGAGCGAAATACAAATATACAACTTTCAACAACGGATCTCTTGGCTCTCGCATCGATGAAG  
AACGCAGC

#OTU-9 *Hypocrea lixii* (*syn Trichoderma lixii*)

AAGTCGTAACAAGGTTCTCCGTTGGTGAACCAGCGGAGGGATCATTACCGAGTTTACAACCTCCCAAACCCAATGTGAACGTTACCAAACCTGTTG  
CCTCGGCGGGATCTCTGCCCCGGGTGCGTCGCAGCCCCGGACCAAGGCGCCCGGAGGACCAACCTAAAACTCTTATTGTATACC<sup>ccc</sup>TCGC  
GGGTTTTTTTATAATCTGAGCCTTCTCGGCGCCTCTCGTAGGCGTTTCGAAAATGAATCAAACTTTCAACAACGGATCTCTTGGTTCTGGCAT  
CGATGAAGAACGCAGC

#OTU-10 *Ionotus hispidus*

AAGTCGTAACAAGGTTTCCGTAGGTGAACCTGCGGAAGGATCATTATCGAGTTTTGAAGCCGGAGGCCTGTGCTGGTGCGGAAACGCACATG  
TGCACGGCTTTTCGTGCTCAAATCCATTTCAAACCCCTGTGCACTTTTGAACCGGTTGAAGTTAGTAGTGAGTAACACTTTTCGACTTGCGACCTA  
GTACTGCGAGTAATACTAGTAGGAGGGTCTTTTGAAGGCCCTTTCGAACGTTTGAAAGCGGGAAAACGTTAAGAGAAGAGAGGGTGAAGGCGAG  
CGCTTTGACTAGTTTGTATTACAAACCCTTTTATTGTTATGTGAATGTAATGCTCCTTGTGGGCGATAATTTGTACAACCTTTCAACAACGGATCT  
CTAGGCTCTCGCATCGATGAAGAACGCAGC

#OTU-11 *Lepiota brunneoincarnata*

AAGTCGTAACAAGGTTTCCGTAGGTGAACCTGCGGAAGGATCATTATTGAATAAACTTGGTGGGTTGTTGCTGGCTTCTTGGAGCATGTGCAC  
GCTCATCGACTTTATCCATCCACCTGTGCACCTTCTGTAGTCTTTGAAATGAAAGCGGCTGAGCCTCGATGGGCATTTTGGCCTATCGGATGTG  
AGGAATGCTTTTGTGAAGGCATGGCTCTCCTCAAAGGCCTGTGATCGTTTCTTGGACTATGTTttCCATATAACCACATAGCATGTTGTAGAATGT  
ATCGGTGGGCCTCTGTGCCTATAGAACTCAATACAACCTTTCAGCAACGGATCTCTTGGCTCTCGCATCGATGAAGAACGCAGC

#OTU-12 *Mucor circinelloides*

AAGTCGTAACAAGGTTTCCGTAGGTGAACCTGCGGAAGGATCATTAAATAATCAATAATTTTGGCTTGTCCATTATTATCTATTTACTGTGAAC  
TGTATTATTACTTGACGCTTGAGGGATGCTCCACTGCTATAAGGATAGGCGGTGGGGATGTAAACCGAGTCATAGTCAAGCTTAGGCTTGGA  
TCCTATTATTATTTACCAAAAGAATTTCAGAATTAATATTGTAACATAGACCTAAAAAATCTATAAAACAACCTTTTAACAACGGATCTCTTGGTT  
CTCGCATCGATGAAGAACGCAGC

#OTU-13 *Mycena maurella*

AAGTCGTAACAAGGTTTCCGTAGGTGAACCTGCGGAAGGATCATTACTGAATAACTGGAGTGTTGTAGCTGGCTTTTTCGGAGCATGTGCACGC  
ATTTCAAATTCATCTTTACCACCTGTGCACTTTTGTAGACTGTGATAACTCTCAATGGTTTTTCCGTTGGATTGAAGGACTTGCGTCTAGCTGTC  
TTTCGATTTACAGTCTATGTCTCATCTACTATAAAAAGTCTAGAATGTAACCTTGTGGGTCTTTTGACCTATAAAACTTATACAACTTTCAACA  
ACGGATCTCTTGGCTCTCGCATCGATGAAGAACGCAGC

#OTU-14 *Penicillium* spp. from to the *P. glabrum* clade

AAGTCGTAACAAGGTTTCCGTAGGTGAACCTGCGGAAGGATCATTACTGAGTGAGGGCCCTCTGGGTCCAACCTCCCACCCGTGTTTATTGTA  
CCTTGTTGCTTCGGTGCGCCCGCCTACGGCCGCCGGGGGGCTTCTGCCCCCGGTCCGCGCGCACCGGAGACACTATTGAACTCTGTCTGAA  
GATTGCAGTCTGAGCATAAACTAAATAAGTTAAAACTTTCAACAACGGATCTCTTGGTTCCGGCATCGATGAAGAACGCAGC

#OTU-15 *Phaeocremonium viticola*

AAGTCGTAACAAGGTTCTCCGTTGGTGAACCAGCGGAGGGATCATTACAGAGTTTCATACTCCAAACCCTTTGTGAACATACCTGTTTCCGTTG  
CTTCGGCAGGTCGGGGGTACCCCCCGCCGCCGGGGCCCCCTCGCGGGGTGCGCCGGCGGGCCTGCCGGAGGGGCACAAGACTCTGTAT  
TTCAAAACTACCTCTCTGAGTTATCTTTACAAATAAGTAAAACCTTTCAACAACGGATCTCTTGGTTCTGGCATCGATGAAGAACGCAGC

#OTU-16 *Phaeomoniella chlamydospora*

AGTCGTAACAAGGTTTCCGTAGGTGAACCTGCGGAAGGATCATTATCGAGTCAGGGTCCTCTGGGCCCCGATCTCCAACCCTTTGTTTATCATA  
CCTTTGTTGCTTTGGCAGACCCGTCCTTCGGGACCGTCGGGGGCGTTTCAGTCGCCTCTGGCCAGCGTCTGCCAGTAGCCCAACCAAAATTCTTT  
GTTACATGTGACGTCTGAACGGTTCCATCAAAATCAAACCAA AACTTTCAACAACGGATCTCTTGGTTCTGGCATCGATGAAGAACGCAGC

#OTU-17 *Phaeoacremonium fraxinopennsylvanicum*

AAGTCGTAACAAGGTCTCCGTTGGTGAACCAGCGGAGGGATCATTACCGAGTCTCGTACTCCAAACCCTTTGTGAACATACCTGTTTCGTTGC  
TTCGGCAGGCCCCGGGGGTCACCTCCCCGGCCCCGCCGCCGGCACCCCCCTCGCCGGGGCGCATGGCGGGCCTGCCGGAGGGGCACAGACTCTGTAT  
TCAAAAACGTACCTCTCTGAGTTATCTTTACAAACAAGTAAA AACTTTCAACAACGGATCTCTTGGTTCTGGCATCGATGAAGAACGCAGC

#OTU-18 *Sebacina* spp.

AAGTCGTAACAAGGTTTCCGTAGGTGAACCTGCGGAAGGATCATTAAATGAAC TTCAAGTCGGTCGTCTGTGCTGGTGGCAACACATGTGCACG  
TCGGCTGCAAATCCACACACCTGTGCACCTTTGACTTTGGGATCCGCTGGTTGGCTTGTCCGACTTGCAGCTGGTTGACTTGTGTGTCGACCTG  
GGTCTCAGGGTATTTTTACACATACTGAATGTAAACGGAATGTCACTGTGCATAATGCGCATAATAAC AACTTTCAACAACGGATCTCTTGGCTC  
TCGCAT

#OTU-19 *Seimatosporium vitis*

AAGTCGTAACAAGGTCTCCGTTGGTGAACCAGCGGAGGGATCATTACAGAGTTATCTAACTCCCAAACCCATGTGAACTTACCATTGTTGCCT  
CGGCAGAACCTACCCGGTACCTACCCTGTAACGACCTACCCTGTAGCGAGTTACCCGGGAACGGCCTACCCTGTAGCGCGCTGCCGGTGGACT  
TCTAAACTCTTGTTATTTATTGTAATCTGAGCGTCTTATTTTAATAAGTCAA AACTTTCAACAACGGATCTCTTGGTTCTGGCATCGATGAAGA  
ACGCAGC

#OTU-20 *Trichoderma atroviride*

AAGTCGTAACAAGGTCTCCGTTGGTGAACCAGCGGAGGGATCATTACCGAGTTTACAAC TCCCAAACCCAATGTGAACCATAACCAAACCTGTTG  
CCTCGGCGGGGTACGCCCCGGGTGCGTCGCAGCCCCGGAACCAGGCGCCCGCCGGAGGGACCAACCAAACCTTTTTCTGTAGTCCCCTCGCG  
GACGTTATTTCTTACAGCTCTGAGCAAAAATTCAAATGAATCAA AACTTTCAACAACGGATCTCTTGGTTCTGGCATCGATGAAGAACGCAG  
C

Table S7. NCBI best BLASTN hits of the ITS1 sequences from the 20 most abundant fungal OTUs identified in grapevine trunk.

| OTU | Best Hit NCBI                                                      | ID<br>NCBI  | Query<br>coverage | E value   | Identity<br>% |
|-----|--------------------------------------------------------------------|-------------|-------------------|-----------|---------------|
| 1   | <i>Alternaria</i> spp. from to the <i>A. alternata</i> clade       | MT556702.1  | 100               | 1,00E-131 | 100           |
| 2   | <i>Aspergillus</i> spp. from to the <i>A. penicillioides</i> clade | KF800460.1  | 100               | 3,00E-148 | 100           |
| 3   | <i>Aurebasidium pullulans</i>                                      | MT573468.1  | 100               | 7,00E-140 | 100           |
| 4   | Unknown <i>Agaricales</i> genus                                    | LC205406.1  | 100               | 6,00E-131 | 99            |
| 5   | <i>Cladosporium</i> spp.                                           | MT852065.1  | 100               | 1,00E-126 | 100           |
| 6   | <i>Diplodia seriata</i>                                            | MT587389.1  | 100               | 4,00E-137 | 100           |
| 7   | <i>Eutypa lata</i>                                                 | MN433694.1  | 100               | 7,00E-145 | 100           |
| 8   | <i>Fomitiporia mediterranea</i>                                    | AY780427.1  | 100               | 0         | 100           |
| 9   | <i>Hypocrea lixii</i>                                              | KY554996.1  | 100               | 4,00E-152 | 100           |
| 10  | <i>Ionotus hispidus</i>                                            | FR686562.1  | 96                | 0,00E+00  | 99            |
| 11  | <i>Lepiota brunneoincarnata</i>                                    | KT002153.1  | 100               | 0         | 99            |
| 12  | <i>Mucor circinelloides</i>                                        | MG554336.1  | 100               | 3,00E-154 | 99            |
| 13  | <i>Mycena maurella</i>                                             | JF908413.1  | 100               | 8,00E-160 | 99            |
| 14  | <i>Penicillium</i> spp. from to the <i>P. glabrum</i> clade        | MT441616.1  | 100               | 5,00E-136 | 100           |
| 15  | <i>Phaeocremonium viticola</i>                                     | MN209190.1  | 98                | 4,00E-137 | 100           |
| 16  | <i>Phaeomoniella chlamydospora</i>                                 | KP887017.1  | 100               | 2,00E-141 | 100           |
| 17  | <i>Phaeoacremonium fraxinopennsylvanicum</i>                       | MH862855.1  | 99                | 2,00E-139 | 100           |
| 18  | <i>Sebacina</i> spp.                                               | EU910901.1  | 95                | 1,00E-127 | 96            |
| 19  | <i>Seimatosporium vitis</i>                                        | NR_156595.1 | 98                | 2,00E-144 | 100           |
| 20  | <i>Trichoderma atroviride</i>                                      | AF456917.1  | 100               | 4,00E-144 | 100           |
